# Supplementary material for: Ni3S2@PANI core–shell nanosheets as a durable and high-energy binder-free cathode for aqueous rechargeable nickel–zinc batteries
Source: Royal Society of Chemistry journal article supplement (doi:10.1039/c9ta00681h), 2019-01-01
Supplement: c9ta00681h1.pdf [file c9ta00681h1.pdf]

## Supporting Information

### Binder-free Ni<sub>3</sub>S<sub>2</sub>@PANI Core-Shell Nanosheets as Durable and High-Energy Cathode for Aqueous Rechargeable Nickel-Zinc battery

Lijun Zhou,<sup>a</sup> Xiyue Zhang,<sup>b</sup> Dezhou Zheng,<sup>a</sup> Wei Xu,<sup>a\*</sup> Jie Liu,<sup>c</sup> and Xihong Lu<sup>a,b,\*</sup>

<sup>a</sup>*School of Applied Physics and Materials, Wuyi University, Jiangmen 529020, PR*

*China E-mail addresses: [weixugreat@126.com](mailto:weixugreat@126.com) (W. Xu), [luxh6@mail.sysu.edu.cn](mailto:luxh6@mail.sysu.edu.cn) (X.*

*Lu).*<sup>†</sup>

<sup>b</sup>*MOE of the Key Laboratory of Bioinorganic and Synthetic Chemistry, The Key Lab*

*of Low-carbon Chem & Energy Conservation of Guangdong Province, Chemistry,*

*School of Chemistry, Sun Yat-Sen University, Guangzhou 510275, PR China*

<sup>c</sup>*College of Chemistry and Chemical Engineering, Yantai University, Yantai 264005,*

*PR China*

#### Calculations:

The loading mass  $m$  (mg cm<sup>-2</sup>) of the Ni<sub>3</sub>S<sub>2</sub> on nickel foam was evaluated by a method that a piece of Ni<sub>3</sub>S<sub>2</sub> sample (cut into 0.5 cm  $\times$  2 cm) was calcined in the H<sub>2</sub>/Ar (or H<sub>2</sub>/N<sub>2</sub>) atmosphere (10 : 90 by volume) at 500 °C for 4 h, then weighed the loss mass and calculated the weigh of Ni<sub>3</sub>S<sub>2</sub> from the following equation<sup>1-3</sup>:

$$m = \frac{\Delta m \times M_{\text{Ni}_3\text{S}_2}}{2M_s} \quad (1)$$

Where  $\Delta m$  is the weight loss after calcining obtained by electronic scales (BT25S, 0.01 mg),  $M_{\text{Ni}_3\text{S}_2}$  and  $M_s$  are the molecular weight of Ni<sub>3</sub>S<sub>2</sub> and S, respectively.

The specific capacity  $C$  (mA h g<sup>-1</sup>) of the battery was calculated from the

discharge curve with the equations as followed:

$$C = \frac{\int_0^{\Delta t} I \times dt}{m} \quad (2)$$

Where  $I$  (mA cm<sup>-2</sup>) is the applied discharging current density,  $\Delta t$  (h) is the discharging time and  $m$  (mg cm<sup>-2</sup>) is the mass loading of the electrodes (3.5 mg cm<sup>-2</sup>).

The mass energy density  $E$  and mass power density  $P$  of the battery were obtained from the following equations:

$$E = C \times \Delta V \quad (3)$$

$$P = \frac{C \times \Delta V}{1000 \times \Delta t} \quad (4)$$

Where  $E$  (Wh kg<sup>-1</sup>) is the energy density,  $C$  is the mass capacity obtained from Equation (1), (2) and  $\Delta V$  (V) is the discharging voltage.  $P$  (kW kg<sup>-1</sup>) is the specific power density and  $\Delta t$  (h) is the discharging time.

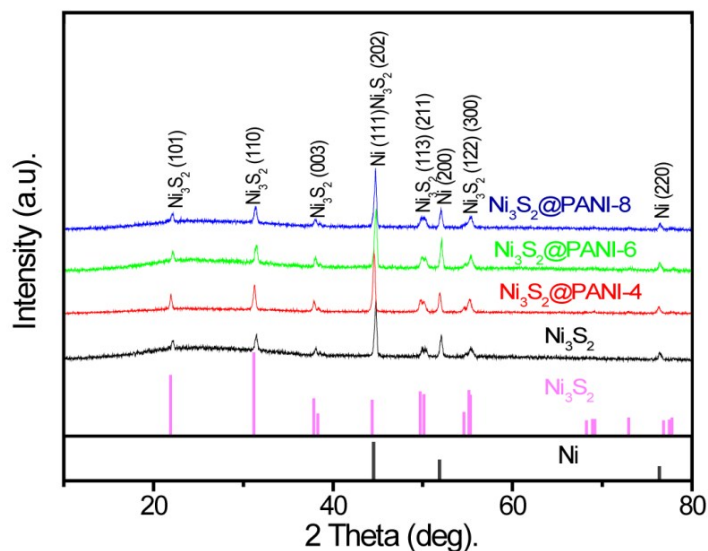

**Figure S1.** XRD patterns of pristine Ni<sub>3</sub>S<sub>2</sub>, Ni<sub>3</sub>S<sub>2</sub>@PANI-4, Ni<sub>3</sub>S<sub>2</sub>@PANI-6 and Ni<sub>3</sub>S<sub>2</sub>@PANI-8 electrodes.

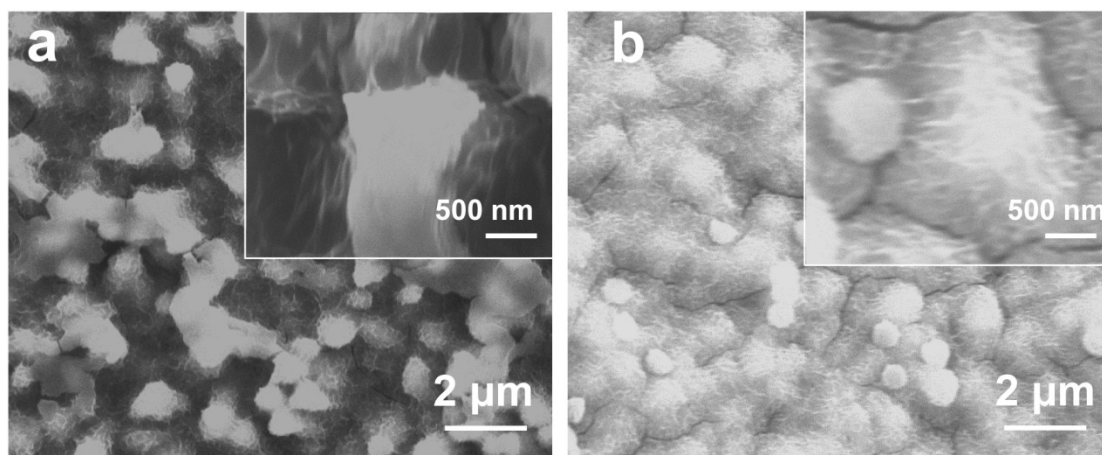

**Figure S2.** SEM images of the (a)  $\text{Ni}_3\text{S}_2@\text{PANI-4}$  and (b)  $\text{Ni}_3\text{S}_2@\text{PANI-8}$  electrodes (lower insets).

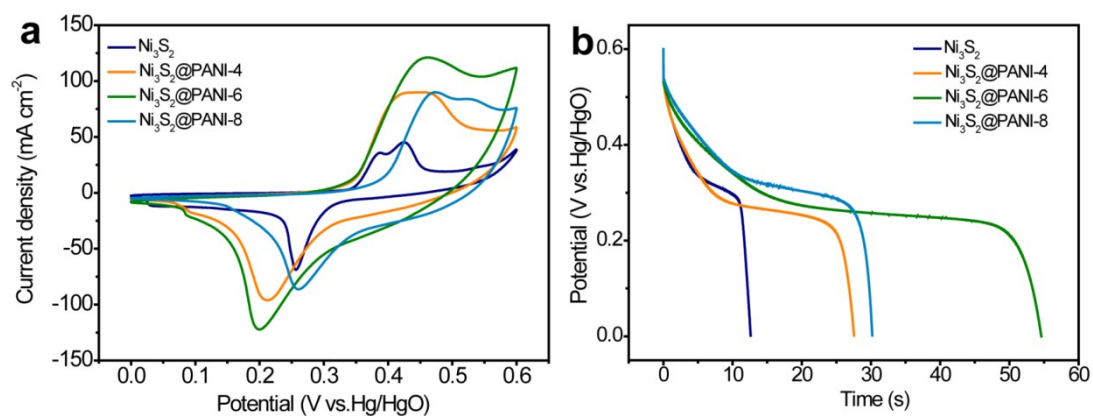

**Figure S3.** (a) CV curves at scanning rate of  $10 \text{ mV s}^{-1}$ , (b) GCD curves at  $14.2 \text{ A g}^{-1}$  of the  $\text{Ni}_3\text{S}_2$ ,  $\text{Ni}_3\text{S}_2@\text{PANI-4}$ ,  $\text{Ni}_3\text{S}_2@\text{PANI-6}$  and  $\text{Ni}_3\text{S}_2@\text{PANI-8}$  electrodes.

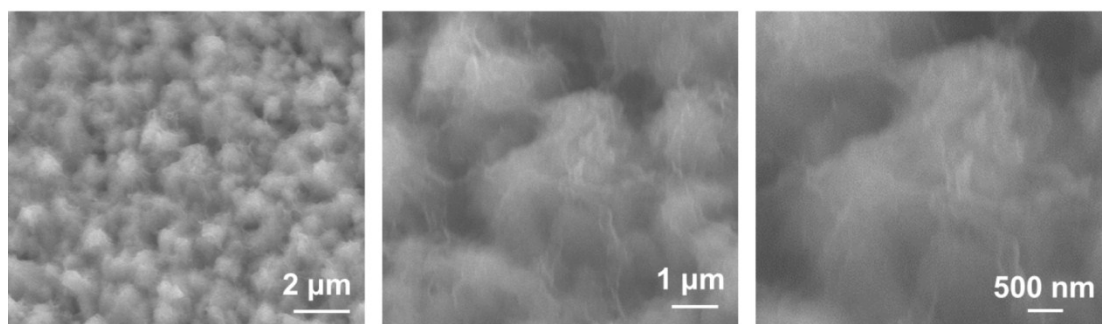

**Figure S4.** SEM images of  $\text{Ni}_3\text{S}_2@\text{PANI-6}$  electrode after 10000 cycles.

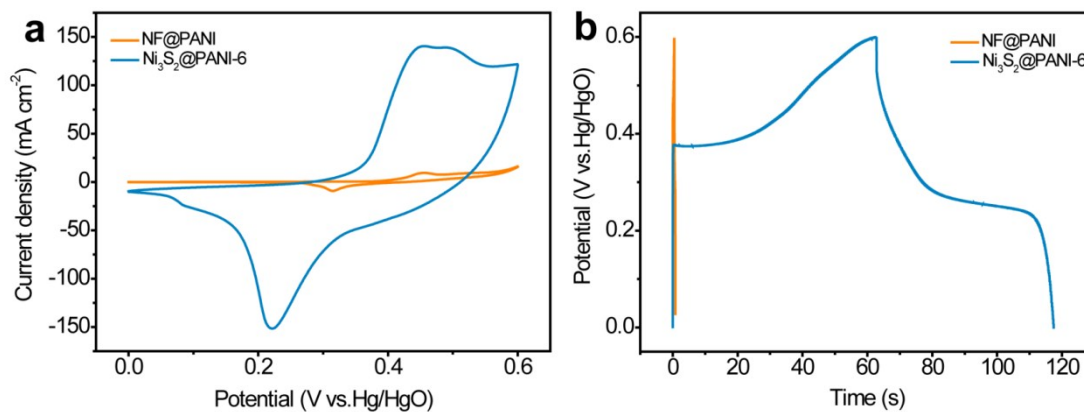

**Figure S5.** (a) CV curves at a scan rate of 10 mV s<sup>-1</sup>, (b) GCD curves at 14.2 A g<sup>-1</sup> of NF@PANI and Ni<sub>3</sub>S<sub>2</sub>@PANI-6 electrodes.

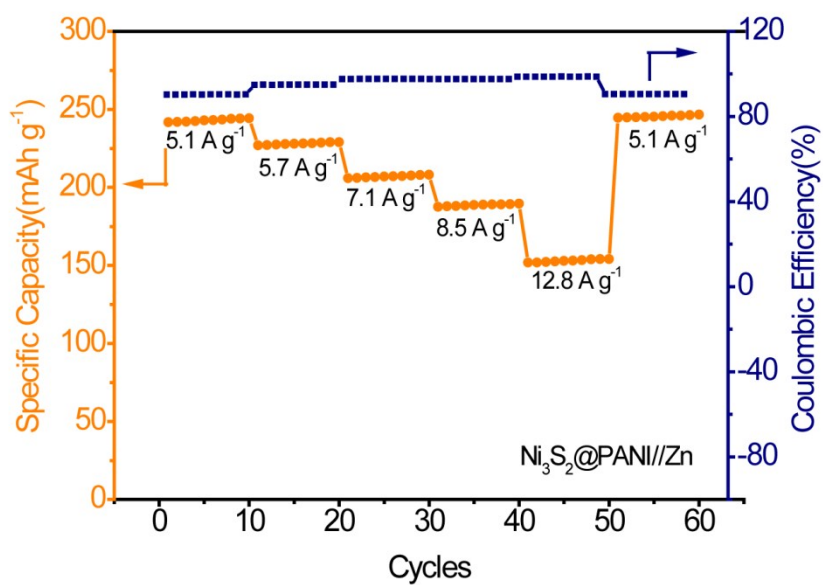

**Figure S6.** The rate performance of Ni<sub>3</sub>S<sub>2</sub>@PANI//Zn battery.

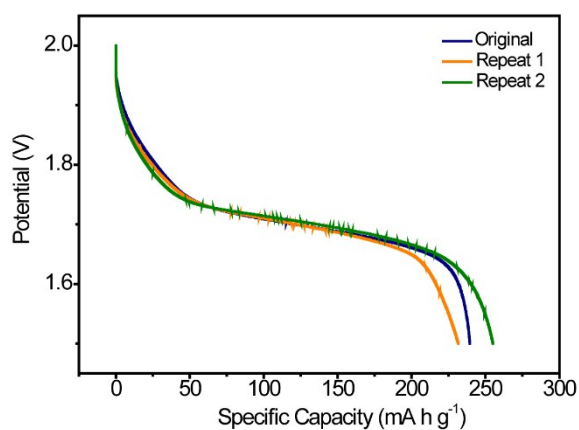

**Figure S7.** GCD curves at 5.1 A g<sup>-1</sup> of Ni<sub>3</sub>S<sub>2</sub>@PANI//Zn battery in repeated experiments.

**Table S1.** The average value of capacities from three experiments (Figure S7).

| No.                             | Original | Repeat 1 | Repeat 2 | Average     |
|---------------------------------|----------|----------|----------|-------------|
| Capacity (mAh g <sup>-1</sup> ) | 241.8    | 232.5    | 254.1    | 242.8 ± 8.8 |

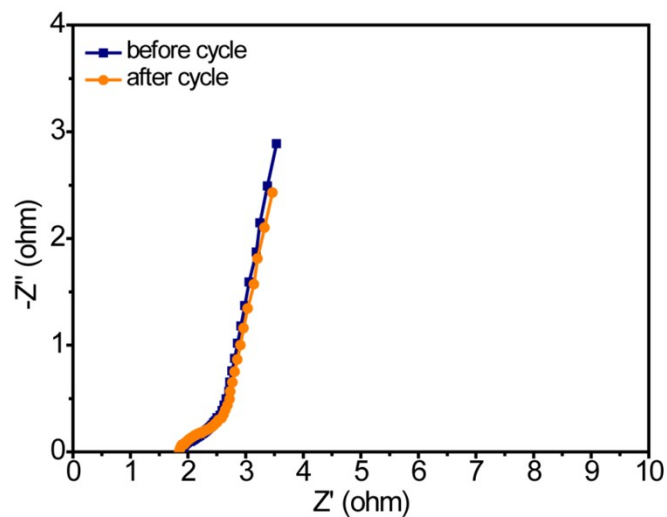

**Figure S8.** EIS spectra of Ni<sub>3</sub>S<sub>2</sub>@PANI//Zn battery before and after 5000 cycles.

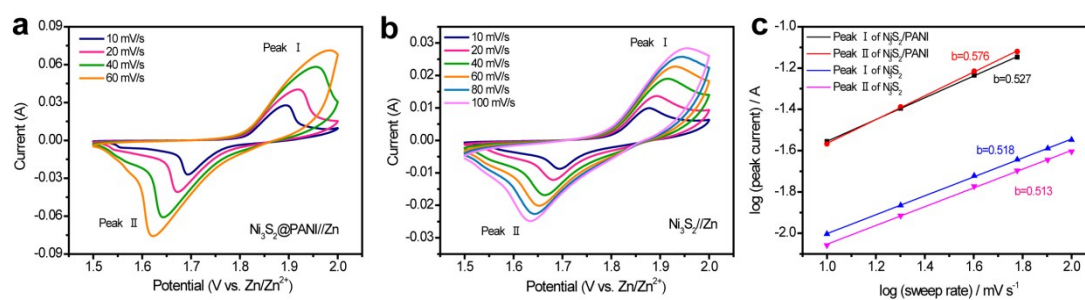

**Figure S9.** CV curves at various scan rates of (a)  $\text{Ni}_3\text{S}_2@\text{PANI}//\text{Zn}$ , (b)  $\text{Ni}_3\text{S}_2//\text{Zn}$ , and log (i) versus log (v) plots at specific peak currents.

## References

1. S. Ni, X. Yang and L. Tao, *Mater. Chem. Phys.*, 2012, **132**, 1103-1107.
2. T. K. Kim, W. Chen and C. Wang, *J. Power Sources*, 2011, **196**, 8742-8746.
3. X. Li, A. Dhanabalan, K. Bechtold and C. Wang, *Electrochem. Commun.*, 2010, **12**, 1222-1225.
